# Supplementary material for: Evidence for Differential Predictive Performance of the Prime Screen Between Black and White Help-Seeking Youths
Source: Atypon-hosted journal article supplement (doi:10.1176/appi.ps.201800536), 2019-07-16
Supplement: appi.ps.201800536.ds001.pdf [file appi.ps.201800536.ds001.pdf]

Table S1. Logistic Regression Analysis with Simple Effects and Covariates Predicting Risk

Status from Race, Prime Screen Cutoff Scores, and their Interaction

|                                                                                  | b    | s <sub>b</sub> | Wald $\chi^2$ | p   | Exp(B) | 95% CI       |
|----------------------------------------------------------------------------------|------|----------------|---------------|-----|--------|--------------|
| Model predicting risk status from Prime Screen cutoff scores                     |      |                |               |     |        |              |
| Age                                                                              | -.07 | .09            | .65           | .42 | .93    | [.78, 1.11]  |
| Mood Disorder                                                                    | .84  | .53            | 2.55          | .11 | 2.31   | [.83, 6.48]  |
| Family Income                                                                    | -.07 | .24            | .09           | .77 | .93    | [.58, 1.49]  |
| Race                                                                             | -.01 | .60            | .00           | .99 | .99    | [.31, 3.22]  |
| Prime Cutoff                                                                     | .28  | .12            | 5.46          | .02 | 1.32   | [1.05, 1.70] |
| Race $\times$ Prime Cutoff                                                       | -.51 | .23            | 4.66          | .03 | .60    | [.38, .96]   |
| Simple effects of Prime Screen cutoff scores on predicted probability of meeting |      |                |               |     |        |              |
| high-risk criteria, at levels of race                                            |      |                |               |     |        |              |
| Black                                                                            | .04  | .12            | .10           | .75 | 1.04   | [.82, 1.32]  |
| White                                                                            | .54  | .21            | 7.02          | .01 | 1.72   | [1.15, 2.58] |

df = 1. Model terms are centered at zero. CI = confidence interval.

Table S2. Logistic Regression Analysis with Simple Effects and Covariates Predicting Early Psychosis Status from Race, Prime Screen Cutoff Scores, and their Interaction

|                                                                                                                              | b    | s <sub>b</sub> | Wald $\chi^2$ | p   | Exp(B) | 95% CI       |
|------------------------------------------------------------------------------------------------------------------------------|------|----------------|---------------|-----|--------|--------------|
| Model predicting early psychosis status from Prime Screen cutoff scores                                                      |      |                |               |     |        |              |
| Age                                                                                                                          | -.06 | (.09)          | .51           | .48 | .94    | [.79, 1.11]  |
| Mood Disorder                                                                                                                | .58  | (.47)          | 1.51          | .22 | 1.78   | [.71, 4.48]  |
| Family Income                                                                                                                | .02  | (.21)          | .01           | .91 | 1.02   | [.67, 1.56]  |
| Race                                                                                                                         | -.05 | (.54)          | .01           | .92 | .95    | [.33, 2.73]  |
| Prime Cutoff                                                                                                                 | .22  | (.10)          | 5.07          | .02 | 1.24   | [1.03, 1.50] |
| Race $\times$ Prime Cutoff                                                                                                   | -.35 | (.19)          | 3.54          | .06 | .71    | [.49, 1.01]  |
| Simple effects of Prime Screen cutoff scores on predicted probability of meeting early psychosis criteria, at levels of race |      |                |               |     |        |              |
| Black                                                                                                                        | .05  | .11            | .24           | .63 | 1.05   | [.86, 1.30]  |
| White                                                                                                                        | .40  | .16            | 6.46          | .01 | 1.49   | [1.10, 2.03] |

df = 1. Model terms are centered at zero. Early psychosis = those with either clinical high-risk or formal psychotic disorders, CI = confidence interval.
